# Supplementary material for: Spatial distribution of prokaryotic communities in hypersaline soils
Source: PubMed Central journal article supplement (PMC6370769; doi:10.1038/s41598-018-38339-z), 2019-02-11
Supplement: 41598_2018_38339_MOESM1_ESM.pdf [file 41598_2018_38339_MOESM1_ESM.pdf]

## **Spatial distribution of prokaryotic communities in hypersaline soils**

Blanca Vera-Gargallo<sup>1</sup>, Taniya Roy Chowdhury<sup>2</sup>, Joseph Brown<sup>2</sup>, Sarah J. Fansler<sup>2</sup>,  
Ana Durán-Viseras<sup>1</sup>, Cristina Sánchez-Porro<sup>1</sup>, Vanessa L. Bailey<sup>2</sup>, Janet K. Jansson<sup>2</sup>  
and Antonio Ventosa<sup>1\*</sup>

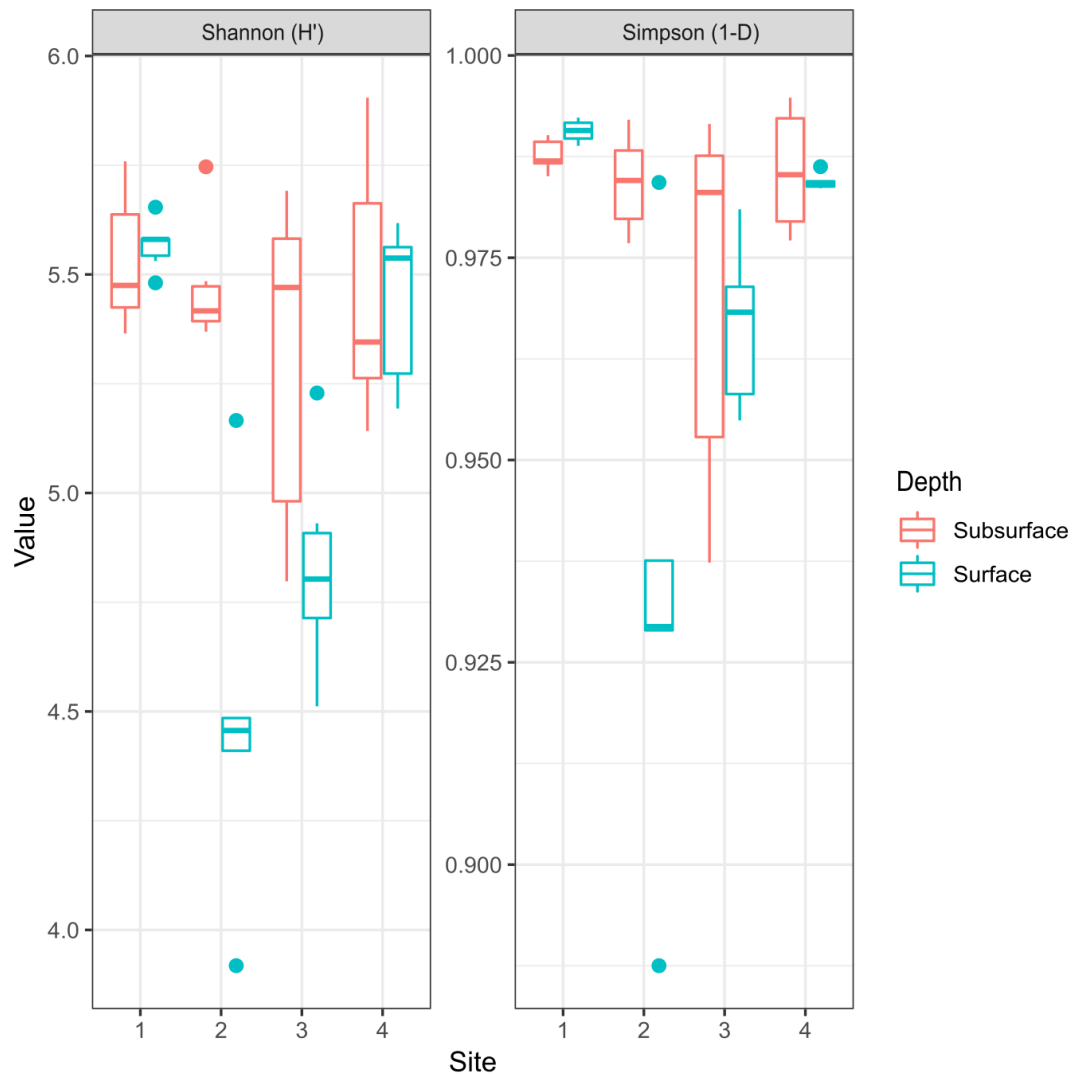

**Supplementary Figure S1.** Alpha diversity metrics (Shannon and Simpson indices) for each site and depth calculated at the ESV level. The plot displays the median, upper and lower 25% quartiles, minimum, maximum and outliers of alpha diversity values.

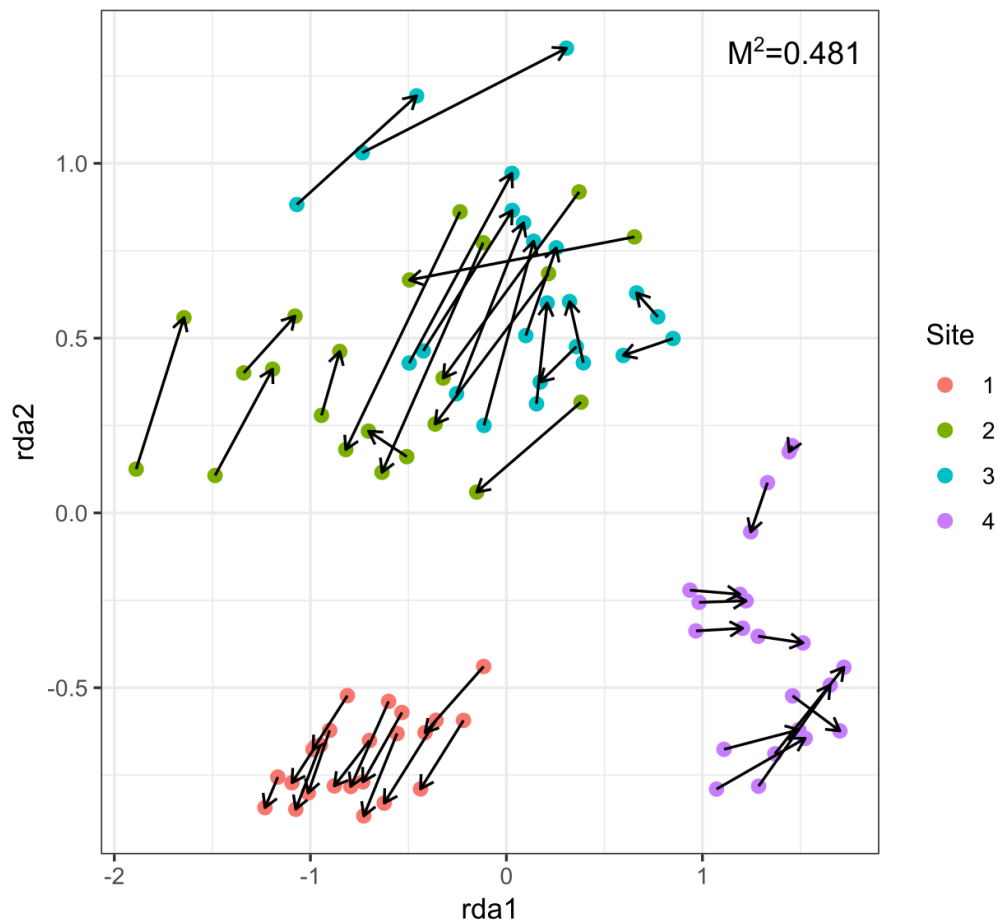

**Supplementary Figure S2.** Procrustes analysis of NMDS ordination analysis based on ESVs and OTUs. NMDS ordination was performed on Bray-Curtis distances of normalized abundance data from ESV-based and OTU-based analyses. Arrows start on ESV-based NMDS data and end on OTU-derived data. The fit of procrustes transformation is indicated as  $M^2$ .
